# Supplementary material for: Point-of-care diagnostics: recent developments in a pandemic age
Source: Royal Society of Chemistry journal article supplement (doi:10.1039/d1lc00627d), 2021-01-01
Supplement: d1lc00627d1.pdf [file d1lc00627d1.pdf]

**Electronic Supplementary Information (ESI) for:**

**Point-of-Care Diagnostics: Recent Developments in a Pandemic Age**

Harshit Harpaldas<sup>a</sup>; Siddarth Arumugam<sup>a</sup>; Chelsey Campillo Rodriguez<sup>a</sup>;

Bhoomika Ajay Kumar<sup>a†</sup>; Vivian Shi<sup>a†</sup>; Samuel K. Sia<sup>a\*</sup>

<sup>a</sup> Department of Biomedical Engineering, Columbia University, New York, NY 10027, USA

<sup>†</sup> These authors contributed equally to this article.

\* Corresponding author.

## **Data acquisition methods for figures in main text:**

### **Figure 3:**

Data on the number of over-the-counter (OTC) test approvals from 1990 to 2020 was obtained from the U.S Food and Drug Administration (FDA) Over the Counter database.<sup>1</sup> Data was collected for each year individually, by setting the effective date from January 1<sup>st</sup> to December 31<sup>st</sup>, exporting search results to a spreadsheet, and enumerating the list.

### **Figure 4:**

All data in this figure was acquired as of September 26, 2021.

For Figure 4A, data on in vitro diagnostics (IVDs) that received emergency use authorization (EUA) in previous public health emergencies was compiled from the FDA website. Information on the current EUAs in place and the tests authorized for each can be found here.<sup>2,3</sup> Information on IVDs that have had their EUA revoked, including tests developed for H1N1 influenza (no current EUA in place), can be found here.<sup>4</sup> Tests were compiled and grouped under assay type (nucleic acid, antigen, antibody) in Microsoft Excel 2019, and graphed in GraphPad Prism 9. The “Other” category for SARS-CoV-2 IVDs includes laboratory developed nucleic acid tests, T-cell tests, and IVDs for management of COVID-19 patients (3 tests detecting Interleukin-6).<sup>5</sup>

For Figure 4B, data on current EUAs for SARS-Cov-2 IVDs was compiled from FDA databases covering the three main assay types (nucleic acid<sup>6</sup>, antigen<sup>7</sup>, antibody<sup>8</sup>). Data on the authorized setting was also compiled from the same databases. Non-POC designates tests authorized to be utilized in laboratories certified under the Clinical Laboratory Improvement Amendments of 1988 (CLIA), 42 U.S.C. §263a, that meet requirements to perform high and moderate complexity tests (H,M). Tests that are categorized as N/A were also included in this category (e.g., collection kits). POC designates tests authorized to be utilized in patient care settings operating under a CLIA Certificate of Waiver (W). Home/OTC designates tests authorized for home-use and available OTC. Note, the home and OTC categories are grouped together as all tests currently approved for home-use are also available OTC. Additionally, all tests were categorized by their most restricted authorized setting, and only tests on the same platform that detect another target (e.g., includes Influenza) were counted more than once in the analysis. All data was compiled in Microsoft Excel 2019 and graphed in GraphPad Prism 9. For more information on the tests included in each category see **Supplementary Table 3**.

### **Figure 5:**

All data in this figure was acquired as of July 15, 2021.

Data on the company founding date was collected from various web searches on google.com. In order to obtain the time (in months) for each company to receive an initial EUA from the FDA, the dates for the company’s first FDA EUA were recorded using the FDA databases.<sup>6-8</sup> The time from the initial declaration of the EUA pathway by the FDA (February 4<sup>th</sup>, 2020) was then calculated and utilized in the analysis. Information on US federal funding was restricted to three sources, National Institutes of Health (NIH) Rapid Acceleration of Diagnostics (RADx)

initiative, Biomedical Advanced Research and Development Authority (BARDA), and the Department of Defense (DoD). For RADx, and BARDA numbers were taken from their respective websites which list funding given to various companies during the COVID-19 pandemic.<sup>9,10</sup> Information on DoD funding was obtained from various press releases from both the DoD and individual companies. Data was collected, and aggregated in Microsoft Excel 2019 and plotted using GraphPad Prism 9.

**Figure 7:**

All data in this figure was acquired as of September 26, 2021.

Using the FDA databases on IVDs that received EUA,<sup>6-8</sup> POC diagnostic platforms were grouped based on their use case (described in main text). The analysis done here was based solely on the platform, therefore platforms with multiple tests were only included once in the analysis. See **Supplementary Table 4** for a breakdown of the tests included in each category.

**Supplementary Tables:**

**Supplementary Table 1:** Company reported performance metrics for POC nucleic acids tests discussed in main text:

| Test Name                                           | Sensitivity (95% CI) | Specificity (95% CI) | Sample Type                          | Reported Limit of Detection (LOD)      | Sample Type                                                         | LOD with FDA Reference Panel          |
|-----------------------------------------------------|----------------------|----------------------|--------------------------------------|----------------------------------------|---------------------------------------------------------------------|---------------------------------------|
| Abbott ID NOW COVID-19                              | 100% (83.9 -100%)    | 100% (88.7 -100%)    | Contrived NP swabs                   | 125 genome equivalents/mL              | Purified RNA diluted in NP matrix                                   | 3x 10 <sup>5</sup> NDU/mL             |
| Mammoth Biosciences SARS-CoV-2 DETECTR kit          | 95% (83.5 - 98.6%)   | 100% (94.2 -100%)    | Clinical NP swabs (prospective)      | 20 copies/μL (20,000 copies/mL)        | AccuPlex Verification Panel Reference material diluted in NP matrix | 5.4x 10 <sup>5</sup> NDU/mL           |
| Sherlock Biosciences Sherlock CRISPR SARS-CoV-2 kit | 100% (83.9 -100%)    | 100% (88.6 -100%)    | Contrived NP swabs                   | 6.75 copies/μL (6,750 copies/mL)       | Extracted RNA diluted in NP matrix                                  | 0.6x10 <sup>4</sup> NDU/mL            |
| Mesa Biotech Accula SARS-CoV-2 Test                 | 95.8% (78.9 -99.9%)  | 100% (86.7 -100%)    | Clinical nasal swabs (retrospective) | 150 copies/mL                          | Heat inactivated virus diluted in nasal matrix                      | 4.75x 10 <sup>2</sup> NDU/mL          |
| Visby Medical COVID-19 Point of Care Test           | 100% (89.0 -100%)    | 95.30% (87.1 -98.4%) | Clinical NP swabs (prospective)      | 435 copies/swab                        | Inactivated virus diluted in NP matrix                              | 5.4x 10 <sup>4</sup> NDU/mL           |
| Roche cobas liat SARS-CoV-2 & Influenza A/B         | 100% (93.6 -100%)    | 100% (98.4 -100%)    | Clinical NP swabs (prospective)      | 12 copies/mL                           | Heat inactivated virus diluted in NP matrix                         | 5.4x 10 <sup>3</sup> NDU/mL           |
| Lucira Health CHECK-IT COVID-19 Test Kit            | 91.7% (85.6 - 95.8%) | 98.2% (95.8 - 99.4%) | Clinical nasal swabs (prospective)   | 2700 copies/swab (900 copies/mL)       | Heat inactivated virus diluted in nasal matrix                      | N/A                                   |
| Cue Health COVID-19 Test                            | 97.4% (86.5 -99.5%)  | 99.1% (96.9 – 99.8%) | Clinical nasal swabs (prospective)   | 1.3 genome copies/μL (1,300 copies/mL) | Viral RNA diluted in nasal matrix                                   | 6 x 10 <sup>4</sup> NDU/mL (Dry Swab) |
| Cepheid Xpert Xpress SARS-CoV-2                     | 97.8% (88.4 – 99.6%) | 95.6% (85.2 – 98.8%) | Clinical NP swabs (retrospective)    | 0.02 PFU/mL                            | Live virus diluted in NP swab matrix                                | 5.4x 10 <sup>3</sup> NDU/mL           |

|                                            |                          |                         |                                    |               |                                                  |                                |
|--------------------------------------------|--------------------------|-------------------------|------------------------------------|---------------|--------------------------------------------------|--------------------------------|
| BioFire Filmarray Respiratory Panel 2.1-EZ | 98.40%<br>(91.4 - 99.7%) | 98.9%<br>(97.5 – 99.5%) | Clinical NP swabs<br>(prospective) | 500 copies/mL | Heat inactivated virus diluted in NP swab matrix | 6.0x 10 <sup>3</sup><br>NDU/mL |
| Cepheid Omni SARS-CoV-2                    | 97.6%<br>(91.5 - 99.3%)  | 99.1%<br>(94.8 - 99.8%) | Clinical NP swabs<br>(prospective) | 400 copies/mL | Heat inactivated virus diluted in NP swab matrix | N/A                            |

**Note:** All performance metrics were obtained from Instruction for Use (IFU) documents from FDA EUA database. NDU stands for RNA NAAT detectable units and is further defined here on the FDA website.<sup>11</sup>

**Supplementary Table 2:** Company reported performance metrics for POC antigen tests discussed in main text:

| Test Name                                           | Sensitivity (95% CI)     | Specificity (95% CI)    | Sample Type                           | Reported Limit of Detection (LOD)            | Sample Type                                         |
|-----------------------------------------------------|--------------------------|-------------------------|---------------------------------------|----------------------------------------------|-----------------------------------------------------|
| Quidel Sofia SARS Antigen FIA                       | 96.70%<br>(83.3 - 99.4%) | 100%<br>(97.9 -100%)    | Clinical nasal swabs<br>(prospective) | $1.13 \times 10^2$<br>TCID <sub>50</sub> /mL | Heat inactivated virus diluted in nasal swab matrix |
| Quidel QuickVue At-Home COVID-19 Test               | 83.5%<br>(74.9 - 89.6%)  | 99.2%<br>(97.2 -99.8%)  | Clinical nasal swabs<br>(prospective) | $1.91 \times 10^4$<br>TCID <sub>50</sub> /mL | Heat inactivated virus diluted in nasal swab matrix |
| Abbott BinaxNOW COVID-19 Ag Card Home Test          | 91.7%<br>(73.0 - 98.9%)  | 100%<br>(87.7 - 100.0%) | Clinical nasal swabs<br>(prospective) | 140.6<br>TCID <sub>50</sub> /mL              | Heat inactivated virus diluted in nasal swab matrix |
| Ellume COVID-19 Home Test                           | 95%<br>(82 - 99%)        | 97%<br>(93 - 99%)       | Clinical nasal swabs<br>(prospective) | $10^{3.8}$ (6,310)<br>TCID <sub>50</sub> /mL | Heat inactivated virus diluted in NP swab matrix    |
| Luminostics CLIP COVID Rapid Antigen Test           | 96.9%<br>(83.8 - 99.9%)  | 100%<br>(97.3 – 100%)   | Clinical nasal swabs<br>(prospective) | $0.88 \times 10^2$<br>TCID <sub>50</sub> /mL | Gamma irradiated virus diluted in nasal swab matrix |
| LumiraDx SARS-CoV-2 Ag Test                         | 97.6%<br>(91.6 - 99.3%)  | 96.6%<br>(92.7 - 98.4%) | Clinical NP swabs<br>(prospective)    | 32<br>TCID <sub>50</sub> /mL                 | Gamma irradiated virus diluted in nasal swab matrix |
| BD Veritor System for Rapid Detection of SARS-CoV-2 | 84%<br>(67 - 93 %)       | 100%<br>(98 -100%)      | Clinical nasal swabs<br>(prospective) | $1.4 \times 10^2$<br>TCID <sub>50</sub> /mL  | Gamma irradiated virus diluted in nasal swab matrix |
| BD Veritor At-Home COVID-19 Test                    | 84.6%<br>(70.3 - 92.8%)  | 99.8%<br>(99 - 100%)    | Clinical nasal swabs<br>(prospective) | $1.87 \times 10^5$<br>TCID <sub>50</sub> /mL | Gamma irradiated virus diluted in nasal swab matrix |

**Note:** All performance metrics were obtained from Instruction for Use (IFU) documents from the FDA EUA database.

**Supplementary Table 3: SARS-CoV-2 POC IVDs that have received EUA, grouped by their authorized setting (Figure 4B)**

| Test Type    | Authorized Setting             | Test Name                                                                                 |
|--------------|--------------------------------|-------------------------------------------------------------------------------------------|
| Nucleic Acid | CLIA waived laboratories (POC) | Visby Medical COVID-19 Point of care Test                                                 |
|              |                                | Mesa Biotech Accula SARS-CoV-2 Test                                                       |
|              |                                | Cepheid Xpert Xpress SARS-CoV-2/Flu/RSV                                                   |
|              |                                | Cepheid Xpert Xpress SARS-CoV-2/Flu/RSV plus                                              |
|              |                                | Cepheid Xpert Xpress SARS-CoV-2 test                                                      |
|              |                                | Cepheid Xpert Omni SARS-CoV-2                                                             |
|              |                                | Cepheid Xpert Xpress SARS-CoV-2 DoD                                                       |
|              |                                | BioFire Respiratory Panel 2.1-EZ (RP2.1-EZ)                                               |
|              |                                | Roche cobas SARS-CoV-2 & Influenza A/B Nucleic Acid Test for use on the cobas Liat System |
|              |                                | Roche cobas SARS-CoV-2 Nucleic Acid Test for use on the cobas Liat System                 |
|              |                                | Abbott ID Now COVID-19                                                                    |
|              | Home/OTC                       | Lucira CHECK-IT COVID-19 Test Kit                                                         |
|              |                                | Cue Health Cue COVID-19 Test                                                              |
| Antigen      | CLIA waived laboratories (POC) | BD Veritor System for Rapid Detection of SARS-CoV-2                                       |
|              |                                | BD Veritor System for Rapid Detection of SARS-CoV-2 & Flu A+B                             |
|              |                                | LumiraDx SARS-CoV-2 Ag Test                                                               |
|              |                                | Luminostics Clip COVID Rapid Antigen Test                                                 |
|              |                                | Quidel Sofia SARS Antigen FIA                                                             |
|              |                                | Quidel Sofia 2 Flu + SARS Antigen FIA                                                     |
|              |                                | Access Bio CareStart COVID-19 Antigen test                                                |
|              |                                | Princeton BioMeditech Status COVID-19/Flu                                                 |
|              |                                | Celltrion DiaTrust COVID-19 Ag Rapid Test                                                 |
|              |                                | Salofa Oy Sienna-Clarity COVID-19 Antigen Rapid Test Cassette                             |
|              |                                | InBios SCoV-2 Ag Detect Rapid Test                                                        |
|              |                                | Ellume Lab COVID Antigen Test                                                             |
|              |                                | GenBody COVID-19 Ag Test                                                                  |
|              |                                | PHASE Scientific INDICAID COVID-19 Rapid Antigen Test                                     |
|              | Home/OTC                       | Quidel QuickVue At-Home OTC COVID-19 Test                                                 |
|              |                                | Ellume COVID-19 Home Test                                                                 |
|              |                                | Abbott BinaxNOW COVID-19 Ag Card Home Test                                                |
|              |                                | BD Veritor At-Home COVID-19 Test                                                          |
|              |                                | Access Bio CareStart COVID-19 Antigen Home Test                                           |
|              |                                | Orasure InteliSwab COVID-19 Rapid Test                                                    |
| Antibody     | CLIA waived laboratories (POC) | Nirmidas Biotech MidaSpot COVID-19 Antibody Combo Detection Kit                           |
|              |                                | ADVAITE RapCov Rapid COVID-19 Test                                                        |
|              |                                | Salofa Oy Sienna-Clarity COVIBLOCK COVID-19 IgG/IgM Rapid Test Cassette                   |
|              |                                | Hangzhou Biotest Biotech RightSign COVID-19 IgG/IgM Rapid Test Cassette                   |
|              |                                |                                                                                           |



|  |  |                                                       |
|--|--|-------------------------------------------------------|
|  |  | Assure Tech Assure COVID-19 IgG/IgM Rapid Test Device |
|  |  | Sugentech SGTi-flex COVID-19 IgG                      |
|  |  | Megna Health Rapid COVID-19 IgM/IgG Combo Test Kit    |
|  |  | NOWDiagnostics ADEXUSDx COVID-19 Test                 |
|  |  | InBios SCov-2 Detect IgG Rapid Test                   |
|  |  | Access Bio CareStart COVID-19 IgM/IgG                 |
|  |  | Diabetomics CovAb SARS-CoV-2 Ab Test                  |
|  |  | LumiraDx SARS-CoV-2 Ab Test                           |
|  |  | Access Bio CareStart EZ COVID-19 IgM/IgG              |

**Supplementary Table 4:** POC IVD platforms that have received EUA for a SARS-CoV-2 test, grouped by their most appropriate use case (Figure 7)

| Assay Type   | Use Case                  | Company Name/POC Platform                                |
|--------------|---------------------------|----------------------------------------------------------|
| Nucleic Acid | Premium Clinic            | Biofire FilmArray 2.1                                    |
|              |                           | Roche cobas Liat                                         |
|              | Premium/Economy Clinic    | Cepheid GeneXpert*                                       |
|              | Economy Clinic            | Cepheid GeneXpert Omni                                   |
|              |                           | Mesa Biotech Accula                                      |
|              |                           | Abbott ID NOW                                            |
|              | Premium Field             | Visby Medical                                            |
|              |                           | Cue Health                                               |
|              |                           | Lucira Health                                            |
| Antigen      | Economy Clinic            | LumiraDx                                                 |
|              |                           | BD Veritor Plus                                          |
|              |                           | Quidel Sofia 2                                           |
|              |                           | Qorvo Biotechnologies Omnia                              |
|              |                           | Celltrion Sampinute                                      |
|              |                           | Ellume Lab                                               |
|              | Premium Field             | Ellume                                                   |
|              |                           | Luminostics Clip                                         |
|              | Economy Field             | Abbott BinaxNOW                                          |
|              |                           | Quidel QuickVue                                          |
|              |                           | Salofa Oy                                                |
|              |                           | Celltrion Diatrust                                       |
|              |                           | InBios International                                     |
|              |                           | Princeton Biomeditech                                    |
|              |                           | Access Bio CareStart                                     |
|              |                           | BD Veritor At Home                                       |
|              | Orasure InteliSwab        |                                                          |
|              | Genbody                   |                                                          |
|              | Phase Scientific INDICAID |                                                          |
| Antibody     | Economy Clinic            | QIAGEN QIAreach                                          |
|              |                           | LumiraDx                                                 |
|              | Economy Field             | NOWDiagnostics ADEXUSDx                                  |
|              |                           | ADVAITE RapCoV                                           |
|              |                           | Sugentech SGTI-flex                                      |
|              |                           | Megna Health                                             |
|              |                           | Access Bio CareStart                                     |
|              |                           | Nirmidas Biotech                                         |
|              |                           | Beijing Wantai Biological Pharmacy Enterprise Co. WANTAI |
|              |                           | Salofa Ou Sienna-Clarity                                 |
|              |                           | Hangzhou Biotest Biotech Co. RightSign                   |
|              |                           | ACON Laboratories                                        |
|              |                           | Hangzhou Laihe Biotech Co. LYHER                         |
|              |                           | Innovita                                                 |
|              |                           | Jiangsu Well Biotech Co. Orawell                         |

|  |  |                                              |
|--|--|----------------------------------------------|
|  |  | Xiamen Biotime Biotechnology Co.,<br>BIOTIME |
|  |  | Biohit Healthcare                            |
|  |  | Assure Tech                                  |
|  |  | TBG Biotechnology Corp.                      |
|  |  | Biocan Diagnostics Tell Me Fast              |
|  |  | Cellex                                       |
|  |  | Healgen Scientific                           |
|  |  | InBios                                       |
|  |  | Access Bio                                   |
|  |  | Diabetomic                                   |

## References

- 1 OTC - Over The Counter, <https://www.accessdata.fda.gov/scripts/cdrh/cfdocs/cfIVD/Search.cfm>, (accessed June 6, 2021).
- 2 Emergency Use Authorization | FDA, <https://www.fda.gov/emergency-preparedness-and-response/mcm-legal-regulatory-and-policy-framework/emergency-use-authorization>, (accessed June 6, 2021).
- 3 Emergency Use Authorizations for Medical Devices | FDA, <https://www.fda.gov/medical-devices/emergency-situations-medical-devices/emergency-use-authorizations-medical-devices>, (accessed June 6, 2021).
- 4 Historical Information about Device Emergency Use Authorizations | FDA, <https://www.fda.gov/medical-devices/emergency-use-authorizations-medical-devices/historical-information-about-device-emergency-use-authorizations>, (accessed June 6, 2021).
- 5 In Vitro Diagnostics EUAs - IVDs for Management of COVID-19 Patients | FDA, <https://www.fda.gov/medical-devices/coronavirus-disease-2019-covid-19-emergency-use-authorizations-medical-devices/in-vitro-diagnostics-euas-ivds-management-covid-19-patients>, (accessed June 6, 2021).
- 6 In Vitro Diagnostics EUAs - Molecular Diagnostic Tests for SARS-CoV-2 | FDA, <https://www.fda.gov/medical-devices/coronavirus-disease-2019-covid-19-emergency-use-authorizations-medical-devices/in-vitro-diagnostics-euas-molecular-diagnostic-tests-sars-cov-2>, (accessed June 6, 2021).
- 7 In Vitro Diagnostics EUAs - Antigen Diagnostic Tests for SARS-CoV-2 | FDA, <https://www.fda.gov/medical-devices/coronavirus-disease-2019-covid-19-emergency-use-authorizations-medical-devices/in-vitro-diagnostics-euas-antigen-diagnostic-tests-sars-cov-2>, (accessed June 6, 2021).
- 8 In Vitro Diagnostics EUAs - Serology and Other Adaptive Immune Response Tests for SARS-CoV-2 | FDA, <https://www.fda.gov/medical-devices/coronavirus-disease-2019-covid-19-emergency-use-authorizations-medical-devices/in-vitro-diagnostics-euas-serology-and-other-adaptive-immune-response-tests-sars-cov-2>, (accessed June 6, 2021).
- 9 Funding | National Institutes of Health (NIH), <https://www.nih.gov/research-training/medical-research-initiatives/radx/funding>, (accessed June 6, 2021).
- 10 MedicalCountermeasures.gov - Coronavirus COVID-19, <https://www.medicalcountermeasures.gov/app/barda/coronavirus/COVID19.aspx?filter=diagnostic>, (accessed June 6, 2021).

- 11 SARS-CoV-2 Reference Panel Comparative Data, <https://www.fda.gov/medical-devices/coronavirus-covid-19-and-medical-devices/sars-cov-2-reference-panel-comparative-data>, (accessed September 30, 2021).
